# Supplementary material
Source: publisher figshare collection journal article supplement (https://acs.figshare.com/ndownloader/files/4190524)
Supplement: Supplementary file 1 [file 4190524]

# MWCNTs/P(St-*co*-GMA) composite nanofibers of engineered interface chemistry for epoxy matrix nanocomposites

*Elif Özden-Yenigün<sup>1</sup>, Yusuf Z. Menceloğlu<sup>1\*</sup>, Melih Papila<sup>1-2</sup>*

<sup>1</sup> Sabancı University, Materials Science and Engineering, Advanced Composites and Polymer Processing Laboratory, 34956 Tuzla, Istanbul, Turkey

<sup>2</sup> currently in Stanford University, Department of Aeronautics&Astronautics, Stanford CA, USA

\* Corresponding author: yusufm@sabanciuniv.edu

## **Supporting Information**

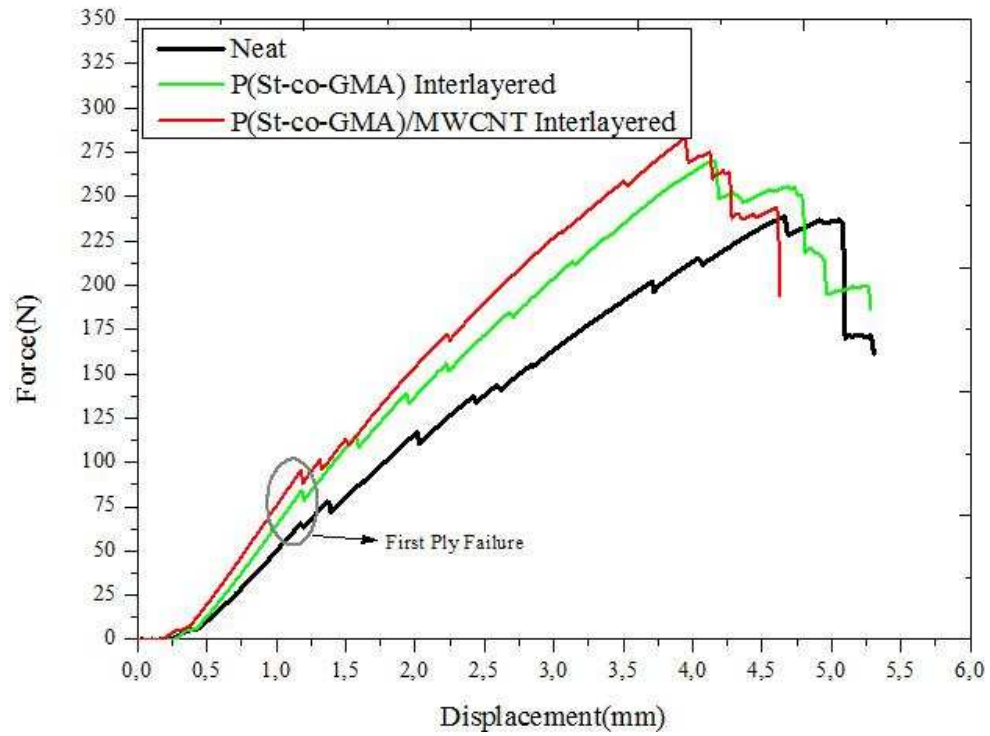

**Figure S1.** Representative force-displacement test curves for [90/0/90] orientation nanofiber reinforced prepreg laminates (43,44)
